# Supplementary material for: Investigating Cortical Inhibition in First-Degree Relatives and Probands in Schizophrenia
Source: PubMed Central journal article supplement (PMC5378912; doi:10.1038/srep43629), 2017-02-27
Supplement: srep43629-s1.pdf [file srep43629-s1.pdf]

## Supplementary Figure 1

This figure demonstrates the averaged EEG signal across nine electrodes (F1, Fz, F2, FC1, FCz, FC2, C1, Cz, C2) for all healthy controls. This figure includes both paired-pulse (red) and single-pulse (blue) data. The discontinuity corresponds to the segment removed to mask the conditioning pulse as discussed in the article.

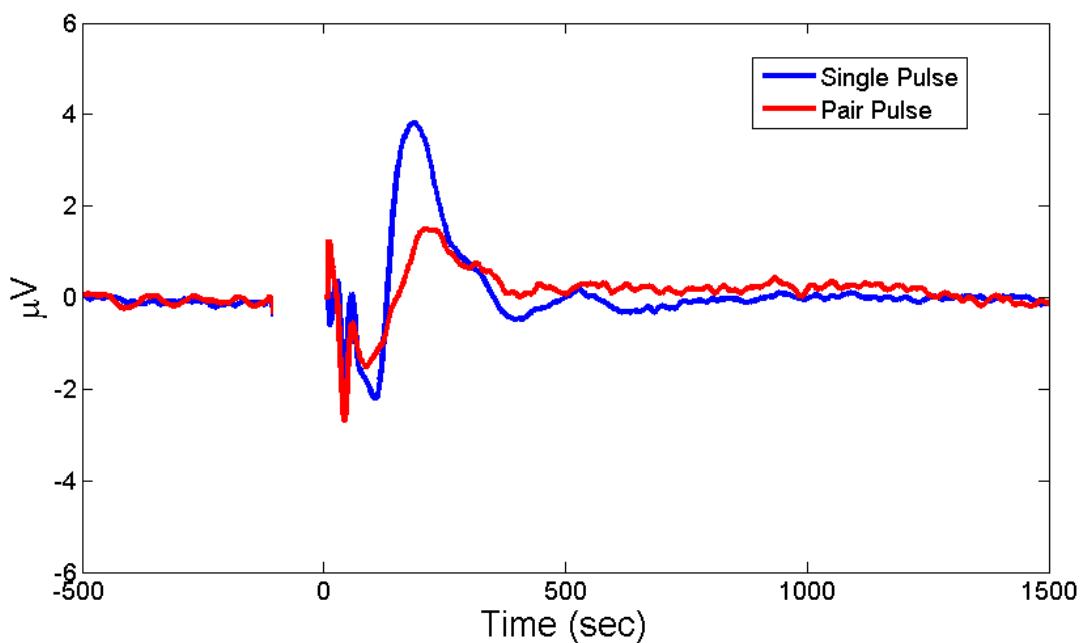

Investigating Cortical Inhibition in First-Degree Relatives and Probands in Schizophrenia

Natasha Radhu, PhD  
Luis Garcia Dominguez, PhD  
Tiffany A. Greenwood, PhD  
Faranak Farzan, PhD  
Mawahib O. Semeralul, MSc  
Margaret A. Richter, MD, FRCP(C)  
James L. Kennedy, MD, FRCP(C)  
Daniel M. Blumberger, MD, MSc, FRCP(C)  
Robert Chen, MA, MBBChir, MSc, FRCP(C)  
Paul B. Fitzgerald, MBBS, MPM, PhD, FRANZCP  
Zafiris J. Daskalakis, MD, PhD, FRCP(C)
